# Supplementary material
Source: HighWire-hosted journal article supplement (https://erj.ersjournals.com/content/55/3/1901886)
Supplement: inline-supplementary-material-1 [file inline-supplementary-material-1.pdf]

| Country             | average TB incidence<br>per year, 2005 to 2013 | Group         |
|---------------------|------------------------------------------------|---------------|
| Albania             | 17                                             | 1. Low (< 25) |
| Antigua and Barbuda | 6,2                                            | 1. Low (< 25) |
| Australia           | 6,4                                            | 1. Low (< 25) |
| Austria             | 10                                             | 1. Low (< 25) |
| Bahamas             | 14                                             | 1. Low (< 25) |
| Barbados            | 2,4                                            | 1. Low (< 25) |
| Belgium             | 10                                             | 1. Low (< 25) |
| Canada              | 5,2                                            | 1. Low (< 25) |
| Chile               | 17                                             | 1. Low (< 25) |
| Costa Rica          | 14                                             | 1. Low (< 25) |
| Cuba                | 7,9                                            | 1. Low (< 25) |
| Cyprus              | 5,0                                            | 1. Low (< 25) |
| Czechia             | 7,9                                            | 1. Low (< 25) |
| Denmark             | 7,1                                            | 1. Low (< 25) |
| Dominica            | 13                                             | 1. Low (< 25) |
| Egypt               | 19                                             | 1. Low (< 25) |
| Fiji                | 24                                             | 1. Low (< 25) |
| Finland             | 6,7                                            | 1. Low (< 25) |
| France              | 9,2                                            | 1. Low (< 25) |
| Germany             | 6,4                                            | 1. Low (< 25) |
| Greece              | 5,7                                            | 1. Low (< 25) |
| Grenada             | 2,8                                            | 1. Low (< 25) |
| Hungary             | 16                                             | 1. Low (< 25) |
| Iceland             | 4,1                                            | 1. Low (< 25) |
| Iran                | 17                                             | 1. Low (< 25) |
| Ireland             | 10                                             | 1. Low (< 25) |
| Israel              | 5,9                                            | 1. Low (< 25) |
| Italy               | 7,1                                            | 1. Low (< 25) |
| Jamaica             | 4,9                                            | 1. Low (< 25) |
| Japan               | 21                                             | 1. Low (< 25) |
| Jordan              | 7,1                                            | 1. Low (< 25) |
| Lebanon             | 13                                             | 1. Low (< 25) |
| Luxembourg          | 7,7                                            | 1. Low (< 25) |
| Malta               | 10                                             | 1. Low (< 25) |
| Mauritius           | 22                                             | 1. Low (< 25) |
| Mexico              | 21                                             | 1. Low (< 25) |
| Monaco              | 2,0                                            | 1. Low (< 25) |
| Netherlands         | 6,9                                            | 1. Low (< 25) |
| New Zealand         | 8,0                                            | 1. Low (< 25) |
| Norway              | 7,3                                            | 1. Low (< 25) |
| Oman                | 13                                             | 1. Low (< 25) |
| Poland              | 23                                             | 1. Low (< 25) |
| Saint Lucia         | 9,3                                            | 1. Low (< 25) |
| Samoa               | 12                                             | 1. Low (< 25) |
| Saudi Arabia        | 16                                             | 1. Low (< 25) |
| Seychelles          | 19                                             | 1. Low (< 25) |
| Slovakia            | 11                                             | 1. Low (< 25) |
| Spain               | 17                                             | 1. Low (< 25) |

|                                                                                                    |      |                   |
|----------------------------------------------------------------------------------------------------|------|-------------------|
| Sweden                                                                                             | 6,8  | 1. Low (< 25)     |
| Switzerland                                                                                        | 7,1  | 1. Low (< 25)     |
| Syrian Arab Republic                                                                               | 24   | 1. Low (< 25)     |
| Tonga                                                                                              | 15   | 1. Low (< 25)     |
| Trinidad and Tobago                                                                                | 20   | 1. Low (< 25)     |
| United Arab Emirates                                                                               | 2,5  | 1. Low (< 25)     |
| United Kingdom of<br>Great Britain and<br>Northern Ireland                                         | 15   | 1. Low (< 25)     |
| United States of<br>America                                                                        | 4,4  | 1. Low (< 25)     |
| Uruguay                                                                                            | 24   | 1. Low (< 25)     |
| West Bank and Gaza<br>Strip                                                                        | 1,08 | 1. Low (< 25)     |
| Algeria                                                                                            | 75   | 2. Medium (25-99) |
| Argentina                                                                                          | 26   | 2. Medium (25-99) |
| Armenia                                                                                            | 66   | 2. Medium (25-99) |
| Bahrain                                                                                            | 27   | 2. Medium (25-99) |
| Belarus                                                                                            | 69   | 2. Medium (25-99) |
| Benin                                                                                              | 68   | 2. Medium (25-99) |
| Brazil                                                                                             | 45   | 2. Medium (25-99) |
| Bulgaria                                                                                           | 41   | 2. Medium (25-99) |
| Burkina Faso                                                                                       | 59   | 2. Medium (25-99) |
| China                                                                                              | 82   | 2. Medium (25-99) |
| China                                                                                              | 82   | 2. Medium (25-99) |
| Colombia                                                                                           | 31   | 2. Medium (25-99) |
| Dominican Republic                                                                                 | 70   | 2. Medium (25-99) |
| Ecuador                                                                                            | 62   | 2. Medium (25-99) |
| El Salvador                                                                                        | 34   | 2. Medium (25-99) |
| Estonia                                                                                            | 31   | 2. Medium (25-99) |
| Guatemala                                                                                          | 29   | 2. Medium (25-99) |
| Honduras                                                                                           | 54   | 2. Medium (25-99) |
| Iraq                                                                                               | 46   | 2. Medium (25-99) |
| Jugoslavia countries;<br>Slovenien, Serbien,<br>Bosnien, Makedonien,<br>Kroatien and<br>Montenegro | 29   | 2. Medium (25-99) |
| Kuwait                                                                                             | 30   | 2. Medium (25-99) |
| Latvia                                                                                             | 57   | 2. Medium (25-99) |
| Libya                                                                                              | 40   | 2. Medium (25-99) |
| Lithuania                                                                                          | 75   | 2. Medium (25-99) |
| Malaysia                                                                                           | 76   | 2. Medium (25-99) |
| Maldives                                                                                           | 42   | 2. Medium (25-99) |
| Mali                                                                                               | 64   | 2. Medium (25-99) |
| Nicaragua                                                                                          | 52   | 2. Medium (25-99) |
| Palau                                                                                              | 69   | 2. Medium (25-99) |
| Panama                                                                                             | 56   | 2. Medium (25-99) |
| Paraguay                                                                                           | 43   | 2. Medium (25-99) |

|                                       |     |                   |
|---------------------------------------|-----|-------------------|
| Portugal                              | 30  | 2. Medium (25-99) |
| Qatar                                 | 40  | 2. Medium (25-99) |
| Republic of Korea                     | 94  | 2. Medium (25-99) |
| Rwanda                                | 89  | 2. Medium (25-99) |
| Singapore                             | 38  | 2. Medium (25-99) |
| Solomon Islands                       | 91  | 2. Medium (25-99) |
| Sri Lanka                             | 66  | 2. Medium (25-99) |
| Togo                                  | 73  | 2. Medium (25-99) |
| Tunisia                               | 30  | 2. Medium (25-99) |
| Turkey                                | 27  | 2. Medium (25-99) |
| Venezuela                             | 29  | 2. Medium (25-99) |
| Yemen                                 | 59  | 2. Medium (25-99) |
| Afghanistan                           | 189 | 3. High (>100)    |
| Angola                                | 379 | 3. High (>100)    |
| Azerbaijan                            | 179 | 3. High (>100)    |
| Bangladesh                            | 225 | 3. High (>100)    |
| Bhutan                                | 192 | 3. High (>100)    |
| Bolivia                               | 140 | 3. High (>100)    |
| Botswana                              | 563 | 3. High (>100)    |
| Burundi                               | 156 | 3. High (>100)    |
| Cabo Verde                            | 148 | 3. High (>100)    |
| Cambodia                              | 452 | 3. High (>100)    |
| Cameroon                              | 272 | 3. High (>100)    |
| Central African Republic              | 491 | 3. High (>100)    |
| Chad                                  | 151 | 3. High (>100)    |
| Congo                                 | 399 | 3. High (>100)    |
| Cote d'Ivoire                         | 212 | 3. High (>100)    |
| Democratic People's Republic of Korea | 375 | 3. High (>100)    |
| Democratic Republic of the Congo      | 327 | 3. High (>100)    |
| Djibouti                              | 529 | 3. High (>100)    |
| Equatorial Guinea                     | 126 | 3. High (>100)    |
| Eritrea                               | 112 | 3. High (>100)    |
| Ethiopia                              | 282 | 3. High (>100)    |
| Gabon                                 | 503 | 3. High (>100)    |
| Gambia                                | 181 | 3. High (>100)    |
| Georgia                               | 138 | 3. High (>100)    |
| Ghana                                 | 186 | 3. High (>100)    |
| Guinea                                | 192 | 3. High (>100)    |
| Guyana                                | 115 | 3. High (>100)    |
| Haiti                                 | 239 | 3. High (>100)    |
| India                                 | 254 | 3. High (>100)    |
| Indonesia                             | 420 | 3. High (>100)    |
| Kazakhstan                            | 153 | 3. High (>100)    |
| Kenya                                 | 313 | 3. High (>100)    |
| Kyrgyzstan                            | 163 | 3. High (>100)    |
| Lao People's Democratic Republic      | 232 | 3. High (>100)    |

|                             |      |                |
|-----------------------------|------|----------------|
| Liberia                     | 288  | 3. High (>100) |
| Madagascar                  | 246  | 3. High (>100) |
| Malawi                      | 344  | 3. High (>100) |
| Mauritania                  | 145  | 3. High (>100) |
| Mongolia                    | 428  | 3. High (>100) |
| Morocco                     | 100  | 3. High (>100) |
| Mozambique                  | 539  | 3. High (>100) |
| Myanmar                     | 388  | 3. High (>100) |
| Namibia                     | 715  | 3. High (>100) |
| Nepal                       | 163  | 3. High (>100) |
| Niger                       | 120  | 3. High (>100) |
| Nigeria                     | 340  | 3. High (>100) |
| Pakistan                    | 276  | 3. High (>100) |
| Papua New Guinea            | 432  | 3. High (>100) |
| Peru                        | 137  | 3. High (>100) |
| Philippines                 | 325  | 3. High (>100) |
| Republic of Moldova         | 168  | 3. High (>100) |
| Romania                     | 116  | 3. High (>100) |
| Russian Federation          | 110  | 3. High (>100) |
| Senegal                     | 137  | 3. High (>100) |
| Sierra Leone                | 316  | 3. High (>100) |
| Somalia                     | 286  | 3. High (>100) |
| South Africa                | 938  | 3. High (>100) |
| Sudan                       | 109  | 3. High (>100) |
| Swaziland                   | 1220 | 3. High (>100) |
| Tajikistan                  | 144  | 3. High (>100) |
| Thailand                    | 192  | 3. High (>100) |
| Timor-Leste                 | 498  | 3. High (>100) |
| Turkmenistan                | 120  | 3. High (>100) |
| Uganda                      | 215  | 3. High (>100) |
| Ukraine                     | 113  | 3. High (>100) |
| United Republic of Tanzania | 441  | 3. High (>100) |
| Uzbekistan                  | 102  | 3. High (>100) |
| Viet Nam                    | 160  | 3. High (>100) |
| Zambia                      | 516  | 3. High (>100) |
| Zimbabwe                    | 452  | 3. High (>100) |
