# Supplementary material
Source: HighWire-hosted journal article supplement (https://erj.ersjournals.com/content/55/3/1901886)
Supplement: inline-supplementary-material-2 [file inline-supplementary-material-2.pdf]

**Table S.2. Number of TB cases, person-years, incidence rates and incidence rate ratios with confidence intervals; before 1<sup>st</sup> pregnancy, during pregnancy and postpartum compared to other time not pregnant or postpartum, in women from high TB incidence countries, by age groups, Sweden 2005-2013.**

| Age group             | Risk period                           | No of TB diagnosis (n=468) | Person-years | Incidence rate per 100 000 person-years (95% CI) | Incidence rate ratio (95% CI) |
|-----------------------|---------------------------------------|----------------------------|--------------|--------------------------------------------------|-------------------------------|
| <b>All age groups</b> | Before pregnancy                      | 175                        | 82 687       | 212 (181-254)                                    | <b>2.21</b> (1.77-2.76)       |
|                       | During pregnancy                      | 82                         | 45 081       | 182 (145-226)                                    | <b>1.90</b> (1.45-2.50)       |
|                       | Postpartum                            | 70                         | 30 018       | 233 (182-295)                                    | <b>2.44</b> (1.90-3.14)       |
|                       | Other time not pregnant or postpartum | 141                        | 147 511      | 96 (80-113)                                      | 1.00 reference                |
|                       |                                       |                            |              |                                                  |                               |
| <b>15-19 years</b>    | Before pregnancy                      | 21                         | 6 885        | 305 (189-466)                                    | 0.55 (0.16-1.83)              |
|                       | During pregnancy                      | 2                          | 975          | 205 (25-741)                                     | 0.37 (0.06-2.19)              |
|                       | Postpartum                            | 2                          | 461          | 434 (53-1567)                                    | 0.78 (0.18-3.26)              |
|                       | Other time not pregnant or postpartum | 3                          | 536          | 560 (115-1636)                                   | 1.00 reference                |
| <b>20-29 years</b>    | Before pregnancy                      | 108                        | 43 606       | 248 (203-299)                                    | <b>1.70</b> (1.23-2.34)       |
|                       | During pregnancy                      | 53                         | 21 128       | 251 (188-328)                                    | <b>1.72</b> (1.18-2.50)       |
|                       | Postpartum                            | 39                         | 13 134       | 297 (211-406)                                    | <b>2.03</b> (1.45-2.85)       |
|                       | Other time not pregnant or postpartum | 56                         | 38 354       | 146 (110-190)                                    | 1.00 reference                |
| <b>30-39 years</b>    | Before pregnancy                      | 43                         | 31 460       | 137 (99-184)                                     | <b>1.60</b> (1.10-2.33)       |
|                       | During pregnancy                      | 25                         | 21 092       | 119 (77-175)                                     | 1.39 (0.88-2.19)              |
|                       | Postpartum                            | 27                         | 14 858       | 182 (120-264)                                    | <b>2.13</b> (1.42-3.19)       |
|                       | Other time not pregnant or postpartum | 72                         | 84 281       | 85 (67-108)                                      | 1.00 reference                |
| <b>40-49 years</b>    | Before pregnancy                      | 3                          | 736          | 408 (84-1191)                                    | <b>9.92</b> (2.73-36.1)       |
|                       | During pregnancy                      | 2                          | 1 887        | 106 (13-383)                                     | 2.58 (0.57-11.8)              |
|                       | Postpartum                            | 2                          | 1 565        | 128 (16-462)                                     | 3.11 (0.72-13.5)              |
|                       | Other time not pregnant or postpartum | 10                         | 24 340       | 41 (20-76)                                       | 1.00 reference                |
